# Supplementary material for: Relative snowpack response to elevation, temperature and precipitation in the Crown of the Continent region of North America 1980-2013
Source: PLoS One. 2021 Apr 13;16(4):e0248736. doi: 10.1371/journal.pone.0248736 (PMC8043397; doi:10.1371/journal.pone.0248736)
Supplement: S1 File — (XLSX) [file pone.0248736.s001.xlsx]

## Sheet: Daymet sorted SWE w %resist
NAME	source	area_ha	OrigID	dswpct_34y	Jun1 SWE	Apr1 SWE	Jun SWE Quartiles		%resist
Belly River	USGS (HUC)	23119.9	111	9.66071	4.06	4.43988			90.3393
Waterton River	USGS (HUC)	24469.5	121	11.9798	4.02763	4.49541			88.0202
Headwaters Saint Mary River	USGS (HUC)	33686.6	116	14.9032	3.51117	4.03102			85.0968
Swiftcurrent Creek	USGS (HUC)	26155.8	117	15.2646	3.39959	3.92732			84.7354
Upper South Fork Flathead River	USGS (HUC)	67961.8	31	22.1693	2.56322	3.16696			77.8307
Kishenehn Creek-North Fork Flathead River	USGS (HUC)	94345.7	68	24.2518	2.51637	3.19862			75.7482
Middle South Fork Flathead River	USGS (HUC)	61557.6	32	23.7844	2.51281	3.15818			76.2156
Castle R Hdwtrs	OWC (Fiera Consulting)	8496.17	243	22.9322	2.49629	3.05898			77.0678
Kintla Lake-North Fork Flathead River	USGS (HUC)	99547.5	69	23.5059	2.46588	3.11576			76.4941
Waterton River Hdwtrs-AB	OWC (Fiera Consulting)	6044.69	250	20.2819	2.45699	3.19558			79.7181
Middle Fork Flathead River-Stanton Creek	USGS (HUC)	80229.1	22	27.7904	2.43464	3.18995			72.2096
Elk River Hdwtrs	USGS (HUC)	67615.6	37	2.76955	2.32044	2.43379			97.2305
Middle Fork Flathead River-Lake McDonald	USGS (HUC)	49190.2	24	22.5997	2.31597	2.91796			77.4003
BC Flathead Middle	USGS (HUC)	44408.5	45	27.0576	2.3157	3.04772			72.9424
Wigwam River	USGS (HUC)	84670.7	46	26.7258	2.31409	3.03887			73.2742
BC Flathead Hdwtrs	USGS (HUC)	48206.3	44	30.7735	2.29312	3.04878			69.2265
Middle Fork Flathead River-Harrison Lake	USGS (HUC)	53033.2	23	26.4706	2.25952	2.95441			73.5294
South Fork Flathead River Headwaters	USGS (HUC)	65449.1	30	28.1573	2.23916	2.93694			71.8427
Fording River	USGS (HUC)	35444.2	38	8.09601	2.23916	2.48389			91.904
Coal Creek-North Fork Flathead River	USGS (HUC)	59874.5	18	27.6275	2.20149	2.91442			72.3725
Middle Fork Flathead River-Morrison Creek	USGS (HUC)	58710.6	21	34.1003	2.16514	3.0328			65.8997
Middle Fork Flathead River Headwaters	USGS (HUC)	53026.5	20	30.6315	2.14866	2.88323			69.3685
Yarrow Creek	OWC (Fiera Consulting)	12802.2	201	17.4137	2.09455	2.39073			82.5863
White River-North White River	USGS (HUC)	55698.5	1	25.1624	2.02079	2.5855			74.8376
Carbondale-Lost	OWC (Fiera Consulting)	3726.57	241	44.4851	1.90243	2.10879			55.5149
Lower Hungry Horse Reservoir	USGS (HUC)	50536	36	35.8141	1.84202	2.64218			64.1859
Summit/Alexander Cr	USGS (HUC)	64607.8	41	35.549	1.80226	2.4979			64.451
Lower Middle Fork Flathead River	USGS (HUC)	75211.8	34	36.229	1.79833	2.5817			63.771
South Fork Sun River	USGS (HUC)	65291.8	91	29.4722	1.79585	2.36247			70.5278
Spotted Bear River	USGS (HUC)	48422.1	33	32.6431	1.79519	2.48379			67.3569
North Fork Blackfoot River	USGS (HUC)	28667.9	10	36.6269	1.77927	2.49347	75th %		63.3731
Camas Creek-North Fork Flathead River	USGS (HUC)	59468.2	19	35.5766	1.77558	2.54748			64.4234
Elk R North Middle	USGS (HUC)	54359.6	40	23.7114	1.72172	2.2356			76.2886
North Fork Sun River	USGS (HUC)	68922.6	90	29.3918	1.71965	2.28907			70.6082
Swan River Headwaters	USGS (HUC)	50307.8	55	29.5223	1.71614	2.34235			70.4777
Line Creek	USGS (HUC)	26621.4	39	25.1093	1.69775	2.19988			74.8907
Upper Saint Mary River	USGS (HUC)	45978.1	118	28.3368	1.62827	2.22466			71.6632
Upper Hungry Horse Reservoir	USGS (HUC)	65320.3	35	40.3838	1.61033	2.40872			59.6162
Upper Swan River	USGS (HUC)	50516.2	56	29.5891	1.5927	2.13113			70.4109
Dry Fork North Fork Blackfoot River	USGS (HUC)	19536.5	9	40.3085	1.57709	2.3281			59.6915
Elk River South Middle	USGS (HUC)	32589.3	42	33.6486	1.56542	2.18169			66.3514
Upper Two Medicine River	USGS (HUC)	77029.4	98	35.7282	1.5542	2.27932			64.2718
Lee Creek	USGS (HUC)	10524.5	119	40.3433	1.48398	2.27167			59.6567
Landers Fork	USGS (HUC)	34121.2	5	42.5701	1.40668	2.14682			57.4299
Upper Kootenay	GeoBase (NHN)	124836	303	25.5662	1.4041	0.312555			74.4338
North Fork Teton River-Teton River	USGS (HUC)	39293.4	70	33.0078	1.27112	1.7701			66.9922
Wild Horse River	USGS (HUC)	37150.5	2	47.9659	1.22949	2.05752			52.0341
Bull River	USGS (HUC)	60856	3	46.7367	1.20801	2.00196			53.2633
Monture Creek	USGS (HUC)	39501	12	42.2729	1.20274	1.88222			57.7271
Tobacco River	USGS (HUC)	49056.2	49	31.1113	1.18346	1.60241			68.8887
Highwood	GeoBase (NHN)	163566	302	22.4407	1.18222	0.598437			77.5593
Middle Swan River	USGS (HUC)	55526.8	57	40.439	1.16067	1.73969			59.561
Lower Elk R	USGS (HUC)	75462.8	43	48.7927	1.08797	1.87103			51.2073
Upper Stillwater River	USGS (HUC)	47330.3	50	45.3128	1.01787	1.60019			54.6872
Badger Creek	USGS (HUC)	68769.8	99	39.8113	1.00697	1.55179			60.1887
Upper Cut Bank Creek	USGS (HUC)	55886.9	105	39.6033	0.998102	1.59307			60.3967
Clearwater River	USGS (HUC)	60418.7	14	49.4997	0.919645	1.6746			50.5003
Whitefish River	USGS (HUC)	47167	54	41.3933	0.899819	1.38058			58.6067
Good Creek	USGS (HUC)	22667.2	51	59.6974	0.890382	1.61068			40.3026
Mission Creek	USGS (HUC)	68201.4	63	21.186	0.886652	1.10613			78.814
Oldman Hdwtrs	OWC (Fiera Consulting)	1544.66	165	19.3596	0.885327	2.12987	50th %		80.6404
Upper Crowsnest River	OWC (Fiera Consulting)	4744.52	226	28.2902	0.825548	1.93763			71.7098
Logan Creek	USGS (HUC)	51933.6	52	62.218	0.818489	1.53411			37.782
Crowsnest North Tribs	OWC (Fiera Consulting)	2411.44	262	62.0464	0.815817	1.24826			37.9536
Finley Point	USGS (HUC)	29665.4	28	51.0232	0.792274	1.28783			48.9768
Jocko River	USGS (HUC)	99361.9	65	44.3192	0.787262	1.30328			55.6808
Pinkham Creek-Kootenai River	USGS (HUC)	31632.8	67	39.1871	0.770581	1.18311			60.8129
Central Kootenay	GeoBase (NHN)	190265	304	43.7051	0.735202	0.233523			56.2949
Upper Dearborn River	USGS (HUC)	40909.4	83	54.9261	0.683873	1.29714			45.0739
Dutch Cr	OWC (Fiera Consulting)	5048.47	258	33.9185	0.635836	2.80043			66.0815
Lower Oldman South Tribs	OWC (Fiera Consulting)	20196.4	212	67.8071	0.624776	0.818242			32.1929
Placid Creek	USGS (HUC)	23837.8	16	63.8735	0.622432	1.44202			36.1265
Lower Swan River	USGS (HUC)	32576.1	58	49.7801	0.593375	1.05961			50.2199
Birch Creek	USGS (HUC)	66244.5	103	40.0426	0.56587	0.875573			59.9574
South Fork Milk River	USGS (HUC)	55346.3	78	65.5536	0.562871	1.31388			34.4464
Fortine Creek	USGS (HUC)	65361.1	48	62.7813	0.537189	1.14107			37.2187
Racehorse Cr	OWC (Fiera Consulting)	2083.25	266	43.1017	0.525762	1.70502			56.8983
Livingstone River	OWC (Fiera Consulting)	1846.35	255	25.087	0.505608	1.76422			74.913
Lower North Fork Blackfoot River	USGS (HUC)	33166.3	11	61.4375	0.487511	1.07938			38.5625
Blackfoot River-Keep Cool Creek	USGS (HUC)	60990	7	69.5881	0.433427	1.14912			30.4119
Gibson Reservoir-Sun River	USGS (HUC)	48169.1	93	52.7585	0.428166	0.816076			47.2415
Blackfoot River Headwaters	USGS (HUC)	29995.9	6	76.8491	0.379573	1.15144			23.1509
Belly River	OWC (Fiera Consulting)	4129.69	252	53.5092	0.378379	1.36991			46.4908
Flathead River-Pablo Reservoir	USGS (HUC)	73472.6	64	31.6056	0.369946	0.506729			68.3944
Ashley Creek	USGS (HUC)	84080.4	26	70.2075	0.362704	0.898999			29.7925
t Mary's Tribs	OWC (Fiera Consulting)	4528.13	146	74.08	0.356231	1.31178			25.92
Deep Creek	USGS (HUC)	49531.4	72	40.6046	0.333823	0.537862			59.3954
Koocanusa-Sand Creek	USGS (HUC)	61498.4	4	63.9616	0.313188	0.741737			36.0384
Dupuyer Creek	USGS (HUC)	40959.7	102	57.5345	0.306508	0.673423			42.4655
Chaffen Cr	OWC (Fiera Consulting)	2940.85	234	72.9033	0.306234	0.938128			27.0967
Flathead River-Columbia Falls	USGS (HUC)	81034.1	25	57.9388	0.292028	0.644657	25th%		42.0612
Flathead River-Camas Praire Basin	USGS (HUC)	84890	66	62.1173	0.288147	0.581149			37.8827
Upper Little Bitterroot River	USGS (HUC)	64588.7	59	72.0653	0.28408	0.778872			27.9347
Blackfoot River-Gold Creek	USGS (HUC)	58288.6	17	71.8835	0.271749	0.792495			28.1165
Nevada Creek	USGS (HUC)	92216.8	8	76.4211	0.260263	0.850734			23.5789
Elk Creek	USGS (HUC)	50169.3	94	66.036	0.254984	0.653491			33.964
Blackfoot River-Cottonwood Creek	USGS (HUC)	63107.8	13	75.5126	0.247464	0.8165			24.4874
Linklater Creek-Kootenai River	USGS (HUC)	48723.2	47	44.9115	0.243225	0.457888			55.0885
Upper Little Prickley Pear Creek	USGS (HUC)	59746.5	81	74.6987	0.242408	0.753632			25.3013
Upper Muddy Creek	USGS (HUC)	42301.7	74	61.4513	0.206386	0.526117			38.5487
Willow Creek	USGS (HUC)	28226.3	92	66.0832	0.197321	0.516894			33.9168
Willow Creek	USGS (HUC)	22843.8	71	64.1314	0.197011	0.525816			35.8686
Lower Crowsnest River	OWC (Fiera Consulting)	17439.4	277	73.3402	0.185982	0.995032			26.6598
Lake Mary Ronan	USGS (HUC)	62768.5	27	77.8919	0.133675	0.417512			22.1081
Blackfoot River-Elk Creek	USGS (HUC)	55980.8	15	87.6661	0.128233	0.628896			12.3339
Lower Oldman River	OWC (Fiera Consulting)	17849.1	272	82.5911	0.124126	1.08271			17.4089
Lower Stillwater River	USGS (HUC)	32734.6	53	75.1349	0.120746	0.40982			24.8651
North Fork Milk River	USGS (HUC)	25061.3	79	89.2662	0.111182	0.663939			10.7338
Willow Creek	USGS (HUC)	36925.5	106	88.4327	0.107536	0.59617			11.5673
Middle Fork Dearborn River	USGS (HUC)	17580.2	84	86.5911	0.102328	0.524547			13.4089
Lower Castle	OWC (Fiera Consulting)	3181.26	223	54.6185	0.0808411	1.22896			45.3815
Willow Creek	OWC (Fiera Consulting)	16668.7	228	81.1888	0.0755132	0.75061			18.8112
Willow Creek	USGS (HUC)	10779.3	120	91.4011	0.0732232	0.595902			8.5989
Sullivan Creek	USGS (HUC)	32862.9	60	87.8598	0.0659344	0.30647			12.1402
Lower Little Prickley Pear Creek	USGS (HUC)	43218	82	88.7048	0.0520725	0.307165			11.2952
Blacktail Creek	USGS (HUC)	22447.1	101	92.209	0.0449265	0.382064			7.791
Upper Oldman	GeoBase (NHN)	51267.8	305	92.1081	0.0429831	0.437929			7.8919
Lower Little Bitterroot River	USGS (HUC)	61764.2	62	85.463	0.0347846	0.176333			14.537
Central Oldman - Willow	GeoBase (NHN)	206044	309	91.3952	0.0265705	0.34172			8.6048
Lower Dearborn River	USGS (HUC)	46706.4	86	91.1237	0.0191559	0.174902			8.8763
Flathead River-White Earth Creek	USGS (HUC)	35129.5	61	89.9466	0.0173702	0.111643			10.0534
dswpct34 is the mean percent change in Daymet SWE from April 1 to June 1 over the full 34 year period of analysis
%resist is the mean % of SWE retention April 1 to June 1 1980-2013

## Sheet: raw SWE data
NAME	source	area_ha	OrigID	swa80_SUM	swa81_SUM	swa82_SUM	swa83_SUM	swa84_SUM	swa85_SUM	swa86_SUM	swa87_SUM	swa88_SUM	swa89_SUM	swa90_SUM	swa91_SUM	swa92_SUM	swa93_SUM	swa94_SUM	swa95_SUM	swa96_SUM	swa97_SUM	swa98_SUM	swa99_SUM	swa00_SUM	swa01_SUM	swa02_SUM	swa03_SUM	swa04_SUM	swa05_SUM	swa06_SUM	swa07_SUM	swa08_SUM	swa09_SUM	swa10_SUM	swa11_SUM	swa12_SUM	swa13_SUM	swj80_SUM	swj81_SUM	swj82_SUM	swj83_SUM	swj84_SUM	swj85_SUM	swj86_SUM	swj87_SUM	swj88_SUM	swj89_SUM	swj90_SUM	swj91_SUM
White River-N White River	USGS (HUC)	55698.5	1	285660	59620	226956	66908	141608	99684	183864	78888	82592	134868	256804	143508	130788	167756	172180	165476	295740	109896	248804	166656	203208	94516	135512	170116	110440	87900	161308	56284	103720	101744	24404	135704	192448	100728	197232	23048	184032	33408	103816	59140	150864	19104	45488	85128	204464	118396
Wild Horse River	USGS (HUC)	37150.5	2	166732	28840	97212	28128	84120	41964	87404	35468	30164	61564	138764	60760	62240	94588	106332	108328	185144	59396	116272	78504	136180	50348	94052	77136	42040	33028	91756	44608	83536	58176	23320	59776	100180	32828	101000	7444	63160	3860	45012	15236	51572	2400	8292	27212	95400	33912
Bull River	USGS (HUC)	60856	3	272916	45684	170652	44740	149880	58744	108676	54072	45116	92392	198080	90868	101728	151356	166528	152128	304768	121416	221196	90264	222660	85124	136556	118432	65664	53956	126700	79652	143024	107492	39320	113392	147264	61816	169920	13920	115564	11300	90972	17788	56108	5996	10420	40480	128128	55800
Koocanusa-Sand Creek	USGS (HUC)	61498.4	4	112964	14168	67068	10548	42116	23912	29720	15068	16304	30124	71392	36572	26912	44552	56752	44260	204684	41048	56412	28420	81240	25288	59620	52736	16196	14008	26220	44724	85312	41772	13456	46616	45204	25544	45772	1768	22432	300	18504	4700	8420	488	1872	9692	31468	19108
Landers Fork	USGS (HUC)	34121.2	5	107292	54608	136052	60052	111484	82008	97912	49012	129432	98096	120220	90552	47592	41028	92184	39272	170096	65080	53456	51128	74608	53192	90520	77816	32296	44556	62840	31168	93756	42480	35276	56500	72164	26840	85060	29712	130540	46000	99884	47892	78544	16592	94472	67404	90064	82076
Blackfoot River Headwaters	USGS (HUC)	29995.9	6	54808	24912	71772	18100	51536	45332	44528	27064	58304	55096	57168	36232	17176	20488	37028	8668	102784	24904	28064	14772	36032	27572	44784	35656	10900	20228	22364	6068	60080	23512	21844	22616	34980	8936	19932	2012	57304	4816	30456	7876	21320	2604	21748	19348	22972	17932
Blackfoot River-Keep Cool Creek	USGS (HUC)	60990	7	83564	50276	154492	49156	82692	77456	88256	43928	108976	122312	101248	70316	56452	41968	70532	15796	203944	63864	56880	45380	80424	63908	88080	70536	36368	52472	70456	16860	102816	46440	36412	43052	68920	18660	32920	10904	121152	21556	55888	21880	44568	3344	52324	52664	46312	42896
Nevada Creek	USGS (HUC)	92216.8	8	97508	67700	178536	59396	90812	77848	91596	40696	107092	158220	102248	71464	49192	64232	69340	18568	242564	57740	81908	58828	89124	82868	84684	90044	37208	65248	43932	10204	124268	54896	54076	49228	69476	26620	32372	13400	128976	22820	58516	16436	38124	1952	38984	59368	37600	38752
Dry Fork North Fork Blackfoot River	USGS (HUC)	19536.5	9	56384	40064	81596	33896	59716	45700	68416	31168	62348	61620	78220	58048	40456	33904	55208	24780	104212	42084	29904	30896	42256	32084	51168	49248	19352	23368	37100	19724	60684	27868	19796	46800	53116	25232	47908	26676	84032	23204	52888	27080	55264	9668	43072	45724	63392	55520
North Fork Blackfoot River	USGS (HUC)	28667.9	10	96768	59584	126688	64640	107424	74228	101680	48628	115816	97948	119832	89388	54880	45352	88356	40392	152132	63368	48828	52152	71176	53556	85484	79980	31060	41084	63352	29820	86320	41632	28288	64164	76528	29876	85808	39324	128356	51256	101172	48544	85396	17892	88636	75900	98396	87804
Lower North Fork Blackfoot River	USGS (HUC)	33166.3	11	42736	29892	70172	28548	38016	33004	46136	23352	44720	66484	53160	41444	31144	21800	39716	10772	111552	34920	26204	25888	39572	33928	47020	37516	18056	20836	25528	8924	54820	22312	14264	26600	35588	12544	23376	13444	51748	16224	29348	12596	26588	2760	24096	29004	30952	29044
Monture Creek	USGS (HUC)	39501	12	80776	70384	146872	54480	74344	62832	107892	41588	80212	97848	125700	93040	62388	49772	93532	38224	200448	86344	55988	64660	74668	54856	82744	78452	35892	40060	61012	33536	100648	47508	35680	68360	80452	46696	61572	50712	135612	33876	59208	34496	80668	7952	50444	60064	97972	80152
Blackfoot River-Cottonwood Creek	USGS (HUC)	63107.8	13	56092	46348	111656	36404	40952	47256	74796	26760	43172	100684	73192	47032	46668	40968	52784	13528	192688	59156	46612	41704	60780	60468	61824	58048	20792	30040	20264	10968	82424	31760	20800	32880	41364	21072	13616	11596	68940	9180	21892	8700	27988	196	10108	27680	29540	19048
Clearwater River	USGS (HUC)	60418.7	14	92784	91712	183752	49560	82704	93356	136160	45972	102624	141268	152088	105108	84168	77260	133212	42352	299756	130112	69716	78428	111032	95000	124828	94896	47464	70592	77600	59756	144252	78236	46764	89948	120760	86808	39688	49020	153524	17988	57484	40992	72068	5264	50476	65380	100888	73700
Blackfoot River-Elk Creek	USGS (HUC)	55980.8	15	33292	29296	71504	18580	17316	32092	57408	13760	24724	75420	51100	23832	21656	29204	37240	7464	165684	40320	27664	22624	51496	57756	46008	38588	11068	20548	6588	8540	61916	22136	11480	22272	21648	16784	1140	2076	32480	1264	4064	1920	14296	12	1124	10756	15128	5580
Placid Creek	USGS (HUC)	23837.8	16	25616	29352	59992	13332	23684	32500	50088	14752	28096	47216	54684	34556	26924	25696	49728	13948	113296	46440	24112	26392	42876	39508	41564	33252	15604	26560	20804	21352	52960	26672	14384	28920	35652	28224	4332	10196	44824	1572	11756	9476	23916	652	7344	15864	32680	21460
Blackfoot River-Gold Creek	USGS (HUC)	58288.6	17	39884	36444	77100	20680	36892	45588	72712	25224	37384	81420	74216	37988	29740	32896	53332	17628	190328	54728	37544	31916	60080	69708	54424	49988	19332	34324	13788	18372	73936	31328	19760	35252	28572	28068	5488	10472	45156	3072	20600	13388	31876	1652	9428	21360	36644	21400
Coal Creek-North Fork Flathead River	USGS (HUC)	59874.5	18	232852	104160	366244	166676	260284	165780	189068	116032	181520	202904	281336	150236	165008	109748	206300	129388	361188	168328	164568	124724	145688	124204	203560	176648	110132	74532	107948	132316	250320	150956	63636	163784	209224	173696	168840	94200	350500	157444	237264	140952	158428	71252	144484	165096	229236	115328
Camas Creek-North Fork Flathead River	USGS (HUC)	59468.2	19	211060	88632	365228	140504	236100	128036	156384	99084	162372	180976	271972	126364	144912	85844	179960	97520	351092	155580	119172	90012	130796	113652	152740	153912	93800	56960	86272	106672	230500	138468	53212	135784	172620	134612	139756	79872	349112	133612	216276	99272	121164	53228	123864	138940	218664	89396
Middle Fork Flathead River Headwaters	USGS (HUC)	53026.5	20	170172	79176	261748	78916	155376	161876	132136	105624	202416	218704	310948	185728	156784	116672	205052	96132	310176	174660	108752	138420	129684	99380	179632	154560	74420	79892	128804	108172	220056	134652	64176	173328	171340	110612	124128	49656	282972	54868	106012	117152	84192	36616	153240	197820	281152	188756
Middle Fork Flathead River-Morrison Creek	USGS (HUC)	58710.6	21	209044	134064	352540	110836	228616	158672	145048	123968	220400	241520	342020	200868	176604	114204	225568	124448	384752	225168	114436	152720	154108	132632	205172	170296	87260	94148	115504	102928	255752	151972	79876	168240	205852	144724	148396	115976	356164	84004	168208	104504	88928	49136	163288	207980	299544	174908
Middle Fork Flathead River-Stanton Creek	USGS (HUC)	80229.1	22	305388	167424	494632	179240	353800	215200	231772	157236	300120	354024	479236	282916	255556	145736	337768	200784	553476	313048	169752	195220	214200	193128	292976	251088	142740	126600	172024	151040	356268	208956	123900	241308	315120	219844	225448	166308	482112	155912	294752	161720	175624	77060	240740	310716	421912	245480
Middle Fork Flathead River-Harrison Lake	USGS (HUC)	53033.2	23	210436	70772	313588	111344	218356	125964	142012	86412	165748	199520	285244	157148	150388	92976	205092	130760	347332	173572	118080	110152	132488	115976	181624	160592	93508	70160	106864	104380	231360	135632	76012	160352	197964	145368	155268	71280	293732	98924	189712	98860	110632	44024	132308	170332	243764	128788
Middle Fork Flathead River-Lake McDonald	USGS (HUC)	49190.2	24	207040	49148	275080	103628	182104	124224	134224	82736	135240	163200	243044	123788	137592	91804	198912	129588	307636	142844	121788	96720	119336	104812	175372	156552	92000	67100	98452	102408	212756	136056	70972	151116	195000	147912	157884	42940	254736	94948	164716	113736	111604	46764	114816	139988	205232	99832
Flathead River-Columbia Falls	USGS (HUC)	81034.1	25	91236	30428	132928	33164	70804	51796	38936	31208	46680	73772	100776	43732	38304	30608	49920	17012	217604	59776	21888	16780	41232	32976	69552	47680	26828	20512	18612	30436	92804	81044	11428	38732	41520	25424	35724	22416	101300	26468	54140	16356	17068	9864	24396	38596	57040	23520
Ashley Creek	USGS (HUC)	84080.4	26	117352	56300	178048	82448	134624	101384	98744	68236	82812	143664	133660	59812	43392	45368	63024	-1	275512	98760	24020	20440	56328	47984	85680	63900	23424	34620	43136	36880	148072	75820	21024	38232	33264	34036	37552	20712	170636	62404	97680	38224	42384	22256	42488	68272	71152	19852
Lake Mary Ronan	USGS (HUC)	62768.5	27	49276	20356	81504	26008	40604	35872	28944	21176	28360	85624	43776	13312	7260	15040	19060	-1	129992	31624	7420	4648	12056	12712	33576	14184	5564	9680	8416	6876	46396	22984	8300	5188	8948	6288	9536	6064	65044	15416	23960	7692	7376	4260	12384	29260	16472	3108
Finley Point	USGS (HUC)	29665.4	28	47368	48616	105676	54960	73176	42048	46200	35896	65396	82276	53652	29520	18852	23156	32632	-1	112268	45616	19656	16952	27936	27520	39272	24748	13180	19812	12240	9880	45568	28624	14188	25148	33008	23900	27036	43376	109212	50444	63932	31012	31520	19900	54276	57484	36344	19116
South Fork Flathead River Headwaters	USGS (HUC)	65449.1	30	195016	162556	337564	112788	205888	179796	278852	125184	222184	228884	328940	237568	174956	136924	242420	117720	431948	232108	152952	161748	181712	139432	210656	199884	91924	116680	180076	111300	252920	127312	101208	190328	224084	141976	166992	125620	350784	75612	178720	121220	233636	49460	159276	183672	285188	226196
Upper South Fork Flathead River	USGS (HUC)	67961.8	31	202764	182628	349424	136500	233444	223580	257372	137548	275804	294236	349508	253156	201512	164640	274724	134660	465852	256552	164132	188204	200320	155488	221748	218864	115820	140892	205564	129568	288848	144524	110392	211824	251428	176380	164456	152988	366200	100724	210460	170912	215020	66220	216156	256080	310968	251364
Middle South Fork Flathead River	USGS (HUC)	61557.6	32	165912	228732	364416	141200	242020	200988	210904	113840	266240	281336	293436	217684	172620	140252	240540	120676	413688	229744	135624	168340	181368	138892	183524	183980	98664	128144	158484	108480	259872	139812	108512	181760	220464	169800	125748	210004	367164	105488	213952	155308	163516	52000	212248	239972	253900	202916
Spotted Bear River	USGS (HUC)	48422.1	33	137576	85252	228048	79936	144040	144124	120768	74316	172688	183852	210232	136328	118664	97700	157288	62704	247200	134476	70592	97592	103376	78360	129528	108476	57452	67496	94712	69664	171052	97588	55828	128236	135284	88760	98616	63404	242672	60336	112760	102488	80224	25600	130488	153820	177552	132776
Lower Middle Fork Flathead River	USGS (HUC)	75211.8	34	211244	208556	412164	179216	273672	185608	189860	115636	275676	308780	312424	195596	177352	131672	216056	97740	448152	236280	115296	151096	172568	151368	201316	163068	88780	102004	110044	92752	274572	161952	95688	176248	211596	157888	141416	189632	412028	149948	217292	120556	116312	42856	206376	244512	252976	163252
Upper Hungry Horse Reservoir	USGS (HUC)	65320.3	35	213724	177912	370212	164660	272208	134352	160820	106752	201032	249344	262972	154208	133736	87076	161896	81252	363184	207428	69104	101672	130316	128552	163564	116688	80388	85340	69760	77160	212436	153428	68408	121528	159564	108816	142564	171184	354952	154172	233544	85652	98400	54716	149204	189800	207924	113972
Lower Hungry Horse Reservoir	USGS (HUC)	50536	36	195960	110780	304060	123072	224372	101876	118224	90768	148828	191088	246376	141232	121904	70140	154356	89992	319664	174036	70476	75844	110452	99620	134412	122708	72004	73480	70768	90356	183428	127240	52072	102384	143628	84256	133816	106316	287036	114528	197020	67744	77568	49016	110684	151348	202908	107232
Elk River Headwaters	USGS (HUC)	67615.6	37	281740	64528	293772	86792	164484	156396	180564	133504	111884	159844	286988	198100	224532	148680	206628	170512	347372	94908	245328	160144	156908	104096	227592	176752	142192	103348	208216	83644	167536	119768	63284	170796	98696	55580	178944	54076	265168	60296	145892	149792	161152	84664	104952	137356	235004	185644
Fording River- Ewin/Todhunter/Chauncey Creek	USGS (HUC)	35444.2	38	161208	35828	148080	49100	82876	107336	114776	66196	67580	121160	180448	109360	96924	90072	118240	90396	159288	56000	133032	89736	89976	69396	100388	96656	86236	57160	107248	37368	53780	57584	14888	83812	34704	26512	106840	15120	125956	31036	66868	90836	104852	26676	48980	99956	153632	99324
Line Creek	USGS (HUC)	26621.4	39	125860	15052	109764	28772	60796	46444	80620	35668	38328	65668	109416	72064	61492	59596	62964	59392	111748	45616	101396	50632	67948	54388	66436	63748	48868	36452	65420	24144	25960	46520	8664	67280	38116	35944	84452	3220	90844	13060	41872	23184	64908	7008	17612	42224	83088	59168
Elk River North Middle	USGS (HUC)	54359.6	40	246712	43468	205600	58992	110944	91732	154580	76028	72608	130196	229420	133836	110084	121664	135340	137908	247004	93584	209308	134648	157528	95184	123544	155172	101336	82964	144628	44720	71468	84128	15576	135632	107924	68440	155400	17524	163652	31708	74100	51324	119036	23128	39724	79440	172120	106756
Summit/Alexander Creek	USGS (HUC)	64607.8	41	382208	52492	281092	58180	153316	69184	190608	58332	67648	139244	257044	176324	142836	159576	225460	178288	333360	201076	314504	84136	181380	107240	151336	182476	100000	93840	156776	95560	181016	171612	46216	186428	187300	120956	282888	15024	233820	16520	95708	16252	121240	2280	15092	71920	181780	147824
Elk River South Middle	USGS (HUC)	32589.3	42	161168	20472	120612	25072	81836	48144	75708	31836	34716	60292	120428	81784	73160	70508	68344	81804	152544	80272	142584	58320	101636	59104	77224	85820	44792	42960	69292	25908	50992	65384	13868	69500	78464	42840	108148	5224	94752	10776	58248	21240	55104	4872	12776	30924	84236	68220
Lower Elk River	USGS (HUC)	75462.8	43	345288	47720	226464	53444	159752	75496	125792	59736	62376	114108	235168	126188	114892	138336	203588	154368	365080	143376	232124	92920	192216	94612	160048	167548	72696	62616	113672	107228	182932	128708	43636	155228	152024	91188	221760	10224	156136	13484	90592	20192	61560	5000	11872	47636	144696	87484
BC Flathead Headwaters	USGS (HUC)	48206.3	44	301400	46128	210476	61908	108900	72148	162520	57164	78844	127640	232784	155256	126184	114104	223748	170528	309036	143388	236844	113204	144492	83048	146028	187064	110448	104560	177220	100040	199268	132836	60652	174760	186800	137576	236808	14644	184636	36540	64116	30660	97268	8424	29652	77360	183476	137132
BC Flathead Middle	USGS (HUC)	44408.5	45	222280	48624	196208	98488	112812	94760	153380	75820	107760	143820	222468	134388	117724	81256	165888	147776	288816	119876	179728	123568	114220	84572	148116	165888	105244	92188	138552	106796	179836	103276	57836	140340	179860	149552	168480	27580	183376	98608	75052	67636	106812	32444	66660	101552	183732	116124
Wigwam River	USGS (HUC)	84670.7	46	391792	108888	309292	237672	263212	193008	277508	155976	247552	275836	435812	258040	214496	192164	302788	258612	577468	248220	316708	262640	252220	183484	270976	304940	175244	127960	195244	245672	348272	186244	91492	269664	309616	259588	289564	81272	272752	237076	206020	149624	197156	80532	177268	195988	358364	227212
Linklater Creek-Kootenai River	USGS (HUC)	48723.2	47	32832	7252	29052	12220	14908	14260	16020	11308	17324	22212	36272	17956	14424	16352	20828	14400	122436	16516	19844	18576	25916	13572	24320	28532	10740	6744	11460	21580	47844	16788	6052	22748	23988	23256	16556	3496	13916	10440	9136	7396	8676	4136	9680	13152	24320	13548
Fortine Creek	USGS (HUC)	65361.1	48	93984	44860	157660	94780	134620	86844	111292	64196	91648	100820	144924	57336	56204	53120	53340	30776	256144	78040	45924	37416	58840	40948	65784	68152	31824	14712	20976	35788	114592	61804	4040	73128	81100	70152	38136	18320	144528	86228	111376	49984	66728	26580	54300	41516	78224	24736
Tobacco River	USGS (HUC)	49056.2	49	91592	46736	135196	120816	131388	74176	102832	52008	105000	99332	133084	75596	56264	58500	63008	59844	210804	75692	66400	68228	61700	44876	69532	82892	52096	27976	33104	62016	96752	57036	14304	73572	87976	82344	61912	47520	131284	122964	124896	64520	84676	34768	87916	71092	101852	63392
Upper Stillwater River	USGS (HUC)	47330.3	50	91676	61488	179736	110272	135392	82036	100084	57288	95180	100932	130724	63740	61352	47308	59708	38608	208424	72700	60176	52048	63772	43284	63304	67148	41976	23620	30824	47208	102428	61040	9416	69068	72928	70188	56800	48584	176316	111500	127036	62244	79724	33364	72324	64708	88956	45052
Good Creek	USGS (HUC)	22667.2	51	46656	28784	81980	51476	64796	43480	55868	36456	45760	51856	62928	35304	33288	21428	33288	14604	105308	36052	23712	17508	32536	24108	30136	32084	13660	9648	17324	19620	52696	25468	2320	32196	32256	26744	26044	16524	89592	52140	61616	33284	43096	21044	34184	31836	46080	21804
Logan Creek	USGS (HUC)	51933.6	52	100552	60984	177344	108140	146164	96992	116792	82580	94488	115636	146596	70792	75384	46192	69856	29672	228480	83032	41084	27472	68128	55692	75108	77876	26260	28680	43144	41436	125472	57400	11392	70760	56112	53144	49376	32656	197396	104692	136396	68464	85832	46420	66064	70080	111408	40072
Lower Stillwater River	USGS (HUC)	32734.6	53	17748	6900	32256	8344	15508	21296	12448	9880	11672	24396	29768	8412	8280	6356	7840	2652	63364	13252	4200	2436	10228	7568	18468	11552	4368	3024	4804	5100	36824	20912	980	10868	5680	8736	5300	3176	21912	6980	11268	4872	5492	2976	5216	6380	9972	3336
Whitefish River	USGS (HUC)	47167	54	85788	51672	162808	83784	112636	67536	75540	43924	76012	86932	119212	55392	53080	37776	56868	33748	173380	59360	49524	38796	56080	38764	60884	58180	37416	20396	31068	42852	100376	62888	11916	56624	59644	53144	52520	46616	149608	84140	106044	48248	61364	24284	58412	58456	82932	41380
Swan River Headwaters	USGS (HUC)	50307.8	55	97492	154504	231268	72224	127204	116304	130156	62736	140844	156400	180044	136356	93652	87864	139284	67796	274336	149008	80872	94612	109292	96604	123732	108432	60448	86936	100664	68212	162180	86664	58104	101812	140100	110368	64516	133888	214860	50124	111372	78464	82680	21940	98956	101276	152172	119980
Upper Swan River	USGS (HUC)	50516.2	56	86748	153812	243476	97248	154016	117716	113536	61916	158904	189624	146712	114916	78496	76852	122044	57020	251996	126748	66096	75860	90888	80320	102160	84764	46292	68476	75664	49932	146716	80544	51164	85944	115872	87852	60016	144760	234608	80428	138240	86196	69740	26092	128316	142040	123500	103664
Middle Swan River	USGS (HUC)	55526.8	57	92740	116220	232296	122028	158832	100208	117272	70908	157504	183820	126016	86704	61904	65320	83272	41036	254180	110908	54936	58308	75440	77288	105280	65732	39036	50636	45008	35328	124992	86212	42432	78580	92896	71104	54568	107408	229444	110944	137652	69624	75616	34588	126148	130836	92056	66420
Lower Swan River	USGS (HUC)	32576.1	58	51764	39408	86676	35952	60912	33320	38888	23688	44668	62356	55876	28936	22172	17404	29496	-1	110176	42644	12728	17016	25736	26508	43756	20088	16924	17668	11348	13596	52108	46508	12336	24084	29660	19216	26148	34444	78124	31540	50056	17060	19444	9916	29992	37940	38692	18120
Upper Little Bitterroot River	USGS (HUC)	64588.7	59	67460	29432	109524	45052	72716	70720	82356	46752	57320	98780	81824	38612	27172	28796	41412	-1	212148	59912	19348	12136	42068	32852	61048	51188	12352	22172	34992	23248	106140	40216	18208	26480	19284	18696	11764	7308	98764	30876	45348	22880	34796	16228	28684	37372	34252	12440
Sullivan Creek	USGS (HUC)	32862.9	60	17152	6100	28328	6464	13152	17052	12956	6612	11008	36024	14568	5024	1468	5004	6164	-1	67388	9704	2384	332	4072	5064	14316	5656	1120	2764	2304	844	19648	8452	4868	3216	1536	1688	428	636	20096	1940	4908	1056	1192	212	3020	10152	2456	252
Flathead River-White Earth Creek	USGS (HUC)	35129.5	61	7584	2316	10880	1652	4576	8652	3568	1800	3516	25564	3492	1512	316	1576	2112	-1	28632	2324	732	32	1212	1200	5500	1096	188	760	392	20	6168	2148	1924	1080	480	344	96	296	6172	280	1512	252	180	12	664	3360	348	116
Lower Little Bitterroot River	USGS (HUC)	61764.2	62	16120	8364	27548	1880	8988	21740	11252	5312	12684	40496	13604	7800	2288	5080	8636	-1	80360	7864	3316	1440	5716	4036	18040	4912	1712	2480	3228	1376	22076	6912	3284	6312	3364	2076	432	1812	18876	152	3424	448	2040	288	3660	6024	2824	1732
Mission Creek	USGS (HUC)	68201.4	63	65076	110532	152424	56204	99256	78320	79952	44088	96920	125444	117772	89980	66376	55756	91028	-1	176560	98376	52520	58736	64104	58016	78496	64152	40348	50972	59300	36428	99192	51244	37068	65156	84156	60996	50740	101092	146496	48328	92360	59188	63460	23324	81832	89744	103604	85304
Flathead River-Pablo Reservoir	USGS (HUC)	73472.6	64	31904	53408	91224	43116	61796	47256	39604	26248	59208	97092	48008	35488	25348	25164	41636	-1	110740	39064	23692	20684	25560	22940	38608	23892	12176	19876	19688	9744	45060	23220	16540	26404	35744	25712	21284	49988	89380	40108	59000	35760	29408	14788	52416	61748	38620	31964
Jocko River	USGS (HUC)	99361.9	65	119316	138836	287684	70132	152440	138248	165800	81080	142368	203596	225548	161800	112452	91492	155488	-1	379072	158700	91744	91540	121252	109756	149348	103176	57104	88676	72332	64496	180532	87596	53004	112280	128556	107432	58640	101288	275404	31484	119068	70492	110200	19764	82576	112732	172796	133200
Flathead River-Camas Praire Basin	USGS (HUC)	84890	66	76776	82948	175648	13928	69612	62500	29988	33160	60588	111908	93184	59024	28508	26464	48000	-1	211856	42044	25900	20060	36288	16068	66812	20828	7196	20996	19624	12536	69564	23848	8268	40880	38936	23408	36984	63808	167356	2552	56624	12760	10872	6168	33680	49984	56748	41640
Pinkham Creek-Kootenai River	USGS (HUC)	31632.8	67	46896	20476	57152	51272	57948	36732	51892	27024	46780	46344	63572	33024	28204	28756	29504	25108	115368	36720	30180	28700	30872	22308	34376	37664	20364	11124	16408	29228	53600	26248	6484	37720	44472	39936	26960	14224	52352	52244	51380	27848	37328	15052	34020	28480	45480	23680
Kishenehn Creek-North Fork Flathead River	USGS (HUC)	94345.7	68	418244	133920	502872	298672	379684	256760	360072	189496	293976	359804	476736	310472	265628	177384	356824	321356	628700	248424	330452	252624	219492	188980	327724	326692	224152	167852	233356	236556	387216	252848	113596	304956	400752	314116	305612	105264	501360	296012	326376	224568	292660	101120	218656	290120	397892	265576
Kintla Lake-North Fork Flathead River	USGS (HUC)	99547.5	69	401840	196284	598776	327288	473252	291880	353904	207252	328984	372424	485900	292304	281124	190584	336988	262628	620020	278808	306684	255016	234444	199912	353632	325420	215936	153624	212960	252812	395412	258620	105760	286728	376488	311952	296972	183576	584704	319936	431960	260976	303004	132244	271964	310684	402416	246476
North Fork Teton River-Teton River	USGS (HUC)	39293.4	70	71916	27632	105252	45300	72808	87060	56932	47664	84676	109816	142680	76856	65392	59804	83696	54844	163240	68024	56528	50980	55388	40392	83508	78644	33328	34812	64604	45268	103108	66072	25524	91800	74496	36768	39980	10352	107340	38420	60012	57680	37788	12656	57160	92800	122612	87264
Willow Creek	USGS (HUC)	22843.8	71	13476	2060	23640	6628	9700	14940	5436	7260	11600	21756	24780	10516	6684	8644	9884	8984	40076	8336	14024	5992	8560	6276	19904	13376	2916	7136	10880	3756	25864	15200	2740	20040	12188	5144	2116	340	11656	4144	6096	5320	2476	808	4224	9096	12460	8168
Deep Creek	USGS (HUC)	49531.4	72	26284	7960	46912	19260	26844	36364	19024	17368	29636	47412	51408	28248	17168	21440	26320	22304	77492	18424	24532	14308	17980	15804	39076	28648	11004	17932	25108	13388	43724	27764	8372	39076	26716	12496	11904	2772	34340	18012	24500	23000	12828	4224	18256	30740	40204	31864
Upper Muddy Creek	USGS (HUC)	42301.7	74	32256	6740	35336	10404	12212	25400	10308	13760	17108	41056	45152	18232	13464	14904	20536	13760	79212	17892	23424	13276	14872	12292	38024	22048	5744	10668	22896	8732	48548	33204	6496	34488	23644	10604	6456	1112	20968	6356	7028	9308	4660	1608	7332	17544	22376	15420
South Fork Milk River	USGS (HUC)	55346.3	78	78560	6772	145528	49392	73532	58596	35800	31352	43192	94248	131412	46884	40860	44756	76456	64480	207572	48384	84924	31744	56596	57968	125416	91144	23956	19396	63792	36628	139160	93672	36476	127852	117972	87956	19488	2848	114548	12892	26240	17064	11396	1476	12880	40628	74664	14788
North Fork Milk River	USGS (HUC)	25061.3	79	17100	28	36736	14348	12108	14600	1876	9020	3292	22192	27008	9356	4964	12980	10240	7304	56868	8768	24848	1776	10880	13660	33820	28916	552	3272	15332	6932	31752	28764	9336	26616	26672	33816	0	0	16312	116	40	0	0	0	0	856	4440	0
Upper Little Prickley Pear Creek	USGS (HUC)	59746.5	81	67904	30416	105284	28724	62816	65604	45128	28060	73716	91044	63372	42028	18768	35480	40660	10216	140416	26872	39556	17612	46544	38036	51784	49520	14720	30312	27320	7032	74328	32160	33120	32676	46616	13068	21988	4228	74920	12080	37860	12968	23496	2512	27736	32560	25188	24596
Lower Little Prickley Pear Creek	USGS (HUC)	43218	82	29964	7924	41192	5800	17224	24948	9332	7308	16016	36604	16312	11988	1092	8760	10384	2976	53944	2656	10164	2708	8764	9672	18928	15316	964	7704	5916	160	22432	11572	9200	9016	12616	1796	5180	388	20740	1304	7604	940	3668	140	2252	5312	2880	3148
Upper Dearborn River	USGS (HUC)	40909.4	83	87096	32080	96768	36452	86612	63812	64436	34312	79936	78752	79964	61360	28864	35828	62904	32804	121944	39296	41768	30364	50668	40988	72004	65136	20612	31500	41292	16296	85092	36192	24164	47900	57932	19096	55052	9976	82840	21808	70608	25320	42380	9988	44656	41052	48964	48528
Middle Fork Dearborn River	USGS (HUC)	17580.2	84	18624	5300	19092	3928	12772	13044	9388	5880	11636	18204	13156	9116	648	4256	9400	3320	32216	4160	7892	3420	8208	8204	15472	12312	1388	4836	6464	352	19128	8980	5556	6604	8972	1608	4316	124	9244	764	5876	684	2940	424	1728	2696	2908	2628
Lower Dearborn River	USGS (HUC)	46706.4	86	15628	2960	24424	2520	6676	12840	4552	3980	7608	25108	7396	5384	428	3720	5400	3048	38856	1556	5612	4428	5168	5416	22252	9968	500	5680	6896	168	15992	8572	3664	5364	5136	848	2392	116	6132	336	2944	420	1532	180	1032	1716	1260	1200
North Fork Sun River	USGS (HUC)	68922.6	90	169572	65580	246460	106476	186920	212628	152740	107196	221776	246892	302136	181348	156744	145620	201296	116804	311568	147372	109488	110504	121488	96252	168692	159972	72528	91856	153488	94244	228780	126712	64672	197208	180768	108352	115272	37416	266244	92132	161676	150080	112176	37068	159548	212160	260536	201464
South Fork Sun River	USGS (HUC)	65291.8	91	183200	85776	249508	113500	204808	207784	208668	119556	205788	222964	279040	196232	141984	138008	180344	100272	294260	136420	105944	91260	111680	104372	156912	173476	72780	80708	145408	84600	215580	94156	66516	182424	188240	102336	150520	47508	267100	93452	191028	145732	176788	57424	144980	188612	236292	214004
Willow Creek	USGS (HUC)	28226.3	92	19380	3752	26008	8868	17064	20856	9976	9776	13680	29272	29952	14132	5616	13536	11152	8756	42820	6904	11924	5036	11944	11696	25172	14476	4760	10084	12484	5576	31716	14484	4048	18584	16584	5992	6144	108	13264	4904	12412	6752	4600	1660	5488	11436	16032	10684
Gibson Reservoir-Sun River	USGS (HUC)	48169.1	93	47804	11144	63704	27376	46412	55368	32008	28156	46084	67712	78780	42948	23632	37132	40268	26848	100704	25864	35860	16080	30696	25048	51404	40888	15040	24980	33764	19036	71184	35164	13564	55644	45336	20896	21148	2484	47512	18932	36648	26068	17748	6148	22116	39204	54892	39300
Elk Creek	USGS (HUC)	50169.3	94	48236	12476	62892	19764	46004	43524	29328	19696	37136	60140	50600	32936	16396	26776	31672	18804	86064	19592	29900	15568	27340	26344	53984	39224	12676	21564	27332	9904	64232	27756	10584	36896	37068	12288	19860	2244	39780	9668	31888	13060	14248	4040	15236	21932	25132	21572
Upper Two Medicine River	USGS (HUC)	77029.4	98	200404	53632	343760	110784	211116	155588	136260	102552	190880	241560	349544	183628	157280	105784	236576	141100	399396	190788	152920	139996	148120	121224	234760	181408	89244	72148	130528	99928	272512	162992	68760	210164	224752	149448	125072	52160	318756	69776	142876	100280	92896	32664	132488	190468	284484	145048
Badger Creek	USGS (HUC)	68769.8	99	122504	27760	222584	52648	107880	100112	69388	69588	108384	157268	223572	115152	97984	76316	149456	68656	276484	118388	86192	95136	88920	67460	141704	112912	47060	44060	77664	65944	170532	113992	33856	120028	122128	76652	67964	15520	201040	28020	62388	61440	37048	20340	74176	120112	173664	100828
Blacktail Creek	USGS (HUC)	22447.1	101	13408	104	27852	2724	5584	6016	1620	4724	3180	16588	20052	5960	2272	2608	6884	1324	43032	6216	7828	2436	6492	3044	15928	9484	324	3020	6300	528	22140	17140	964	11400	9336	5080	164	0	11968	16	88	36	0	0	72	828	3864	160
Dupuyer Creek	USGS (HUC)	40959.7	102	37736	8000	46708	10752	18640	27964	15280	17928	23548	49852	58816	26936	18096	20168	32176	16828	87596	25632	25044	17560	20856	15072	43456	30976	8840	10932	24036	12372	53004	38968	8272	37864	31892	16028	10864	1500	31588	5204	8872	11444	6944	2384	12592	24908	34256	21824
Birch Creek	USGS (HUC)	66244.5	103	66392	18064	103364	24292	51152	58032	40348	37264	61664	97884	116720	62308	55896	46220	79348	38648	157088	60396	43564	48832	44064	32900	82816	63000	25692	24888	45864	36732	93668	65052	19712	70132	62532	37536	36132	6816	93792	14172	30240	36364	22376	8800	41036	71336	93752	61500
Upper Cut Bank Creek	USGS (HUC)	55886.9	105	103596	21996	179764	53544	101976	79000	63104	47020	82984	124500	162004	72896	56088	45648	106624	75884	219400	76060	88072	63284	72060	68940	132364	102892	41872	33652	74900	48332	149984	90844	38816	131140	123292	94548	61716	24308	146436	33552	66316	47476	46404	13664	56172	86624	115424	51668
Willow Creek	USGS (HUC)	36925.5	106	29992	368	68012	12052	21912	18460	5116	14120	12484	31492	45520	11840	5984	8048	17188	9076	81736	15704	27192	8348	18820	18804	38608	28060	2096	6564	15148	3916	49492	32620	5320	35704	26684	21992	1604	0	35216	484	1996	612	220	0	1444	3748	12204	840
Belly River	USGS (HUC)	23119.9	111	128624	27940	154844	85296	108060	97584	99276	52360	96000	123484	157408	84020	94076	73172	148244	121324	184476	80324	91116	78088	74736	64656	117696	110788	65244	73504	123348	83844	147468	102788	50204	117840	161876	110376	117652	27624	157244	85052	108108	103360	96932	30124	88476	117600	146476	77684
Headwaters Saint Mary River	USGS (HUC)	33686.6	116	175716	40252	232480	99652	167480	117784	130348	70048	138516	173508	235956	122812	119100	88088	194160	141396	264376	134536	115184	110396	111396	98088	165160	141112	90296	51128	106996	93752	197696	125208	71272	154700	197724	140588	158580	44076	227924	92860	154184	117792	121284	42676	127320	164396	217452	115472
Swiftcurrent Creek	USGS (HUC)	26155.8	117	138624	24332	168528	78696	111900	89732	96928	47940	95228	125284	171068	82972	85572	68416	149108	112916	197820	86504	94040	79228	85144	76204	130008	114184	65840	46524	94812	78492	153752	101252	49908	125224	161624	104748	120856	25040	164784	70716	103244	89796	88736	27984	87968	115576	155496	73256
Upper Saint Mary River	USGS (HUC)	45978.1	118	124632	18964	173772	73672	96632	86604	74052	41380	77312	119768	175392	72564	72300	71188	140360	103368	238452	74724	114604	63920	78656	65608	145904	120896	49384	48492	120300	69652	174252	116824	44940	147164	174292	107688	81016	19236	156336	54304	73812	70296	64440	15216	63704	92104	135680	53224
Lee Creek	USGS (HUC)	10524.5	119	26348	3624	34576	18076	20704	20844	15112	9756	16400	24076	36964	16836	18072	16920	33176	26240	58400	17064	28060	10468	18508	14784	33076	26780	10176	16784	34864	16724	43612	30588	10908	32560	43568	28232	12712	1704	31288	11636	12648	13220	8180	936	7780	15072	27472	8932
Willow Creek	USGS (HUC)	10779.3	120	8292	0	15088	3840	3704	6324	380	2212	776	7428	10860	3128	1536	4356	4020	2244	23308	2656	12220	1440	3280	4612	14228	10952	140	1168	6376	3092	16028	11564	2908	10572	9340	10324	0	0	5596	44	28	0	0	0	0	188	980	0
Waterton River	USGS (HUC)	24469.5	121	137664	42616	173424	88464	130344	106816	116500	67052	105000	134272	176784	98488	109480	72476	159832	130424	196460	94800	92604	83664	79116	74112	123096	109964	76084	68688	99132	90468	147876	104336	55344	113496	160660	120480	121600	37732	177876	86336	128288	110172	108736	40884	95456	127948	164084	91232
Highwood	GeoBase (NHN)	163566	302	402628	51328	528824	175192	293700	420972	279072	218332	208420	306904	425084	339992	323036	258380	291712	292104	597504	151604	326708	162200	208844	142172	323960	279012	173144	111996	241496	134556	190836	207720	49616	191460	93848	97884	171636	26956	436804	101000	195976	338740	249116	111552	162016	225292	304960	260952
Upper Kootenay	GeoBase (NHN)	124836	303	493132	103016	430004	132540	205924	174472	283584	147080	125532	264040	479444	248036	232228	237992	270072	259796	489396	144628	337036	271512	269608	150404	276264	278932	168680	129576	260632	112308	205784	159328	48980	194232	250436	114720	280376	56028	332028	64656	136544	106752	213692	49844	81880	164716	361028	193028
Central Kootenay	GeoBase (NHN)	190265	304	526004	103416	350932	88256	217788	152504	290804	101376	108332	200540	435540	202976	185580	259476	274712	276252	643852	156240	293044	270204	328796	139744	266748	249356	137656	84796	266508	99556	230280	127724	51316	134788	300588	156096	259740	32092	231956	17496	128040	73464	204088	7988	47028	99888	316044	131020
Upper Oldman	GeoBase (NHN)	51267.8	305	53724	0	62512	17612	33304	21408	11296	5988	4884	37812	36292	19416	14136	13708	30160	15440	85308	2636	40728	4708	12628	23780	58628	16976	44	8092	10936	2668	37076	26012	1412	32524	5484	16024	2096	0	19708	284	8248	124	48	0	12	564	1244	368
Central Oldman - Willow	GeoBase (NHN)	206044	309	159908	0	223516	81140	108640	105516	23068	21668	15140	157648	123988	55968	32988	48432	99660	49672	278148	10208	114344	19748	35072	33412	178724	26532	12	14980	44716	18292	104984	81800	292	73128	4456	48116	2608	0	58248	1568	13676	2192	424	0	4	7120	5664	956
Chaffen Cr	Combined AB	15425.7	234	28264	220	33848	12968	18504	25596	17208	9140	6696	22740	27760	18996	13500	16728	23328	14120	35056	5860	18084	3576	11380	7500	19732	14028	4496	4020	14164	7056	15572	16168	232	14028	4772	7044	4632	0	21960	1472	4172	8772	7452	316	780	7968	12876	6356
Lower Castle	Combined AB	51506.8	223	128832	9168	132224	31188	58104	41548	79384	32636	21840	70388	86628	62168	39128	44316	90464	78516	156124	30308	93272	33192	41656	44476	82356	59764	26596	31168	53628	27320	124668	82896	35388	80548	83244	59048	57280	2160	92832	17536	28680	11728	42768	5356	8464	23684	43636	31908
Lower Crowsnest S	Combined AB	25369.2	277	58252	2856	55124	5252	21076	10796	30792	4540	4632	27668	37040	27492	16136	25728	33828	28324	68900	10832	39772	9416	23516	21712	39236	24872	8468	10940	18608	8548	49712	37144	8896	36292	27440	24428	19772	0	32176	0	5076	56	10176	0	0	2600	11204	10924
Belly River	Combined AB	20602.2	252	38352	2956	48388	19416	25516	27848	18552	13180	15392	31144	46868	19520	19908	16952	38124	29956	73248	17916	40156	10216	16820	17892	42364	27992	9500	21384	41972	15308	52196	37368	11056	35884	41724	34516	11452	1412	33668	8928	12144	11792	8040	1616	7212	14196	25180	8360
Oldman Tribs S	Combined AB	55160.4	212	83152	3048	104920	24332	38536	27112	41480	22232	12288	59720	64968	36688	24908	27800	66496	54380	134792	19824	72116	16932	25308	35860	74836	32016	10936	20852	32728	12904	97912	67996	25000	61272	54812	46420	19508	904	55880	8080	12488	4960	14884	1752	4468	12896	22168	11352
Crowsnest N Tribs	Combined AB	32356.7	262	87068	2320	83784	15756	51896	23904	63612	13168	14204	45556	65288	49700	34968	42520	52692	38612	85860	15492	62412	15068	36664	33984	57488	38596	17788	18012	29076	15120	57200	53348	14840	58716	36584	41956	33096	0	55400	688	21536	1612	34312	48	836	11148	29116	25904
Carbondale-Lost	Combined AB	30910.3	241	147388	22788	121072	20840	52716	30244	82052	15820	20916	54188	94208	76148	45020	60116	87956	75196	139348	50408	103084	36816	59788	39796	63884	81464	43464	38876	70564	36448	105380	77560	27020	84296	91120	60252	9852	5604	99980	5512	24120	4192	41992	240	4232	19876	57604	54640
Crowsnest Headwaters	Combined AB	27227.4	226	121284	14192	96784	16872	46660	21732	70860	12876	17576	52472	82536	61556	42040	63092	68152	54940	110980	54140	101492	23328	55480	34816	54952	54296	30272	26204	45412	30052	70916	68088	14916	64816	64184	46612	77456	4184	76140	3104	23132	3812	44336	184	3152	23224	50680	46516
Yarrow Complex	Combined AB	31316.6	201	91628	16492	121708	51272	71100	52660	65100	34288	44796	79956	114424	68460	72100	43692	121724	111264	159480	42768	95156	60748	56316	42580	73440	61572	42436	47268	76488	42412	117460	87540	45504	81912	95412	74556	47264	7012	110284	36864	50492	36960	50160	7988	29532	55176	89476	52292
Dutch Cr	Combined AB	16824.6	258	70048	4996	66064	16528	35556	24088	49032	18952	23224	39396	57672	41732	36964	34640	33432	28196	58428	19440	52448	18676	31900	28500	40332	33064	23240	17032	30128	15392	19440	30072	9848	43064	15952	19908	43748	856	54008	4832	22108	7720	39480	2248	7664	24096	42388	32340
Lower Oldman	Combined AB	32587.2	272	57904	0	61044	17340	32436	25188	33588	9788	9588	39328	48976	29608	22240	27520	33640	23116	66364	7584	38868	7052	22652	19756	46488	22100	4936	8196	17040	9036	28572	30900	3948	39248	6028	17196	8324	0	31236	456	5728	2168	11460	0	88	7632	15708	8116
Racehorse Cr	Combined AB	31236.8	266	116344	5404	106864	23300	59224	33464	88204	24668	30824	60832	91064	68700	53136	58412	56480	47072	98384	27836	94512	23780	54984	44344	66920	53360	35184	26676	46296	26636	46556	64152	17872	72008	42844	47556	66176	336	84012	2820	31872	4472	66616	440	4668	29824	59632	48472
Livingstone River	Combined AB	35795.7	255	123008	8420	125512	47864	74228	111204	90884	50840	54668	93308	127568	80468	76876	76080	77232	59796	111076	32664	79496	38712	48260	39508	69964	73100	49848	33076	79524	27756	37680	47416	4264	52876	22684	21288	64488	128	102464	22252	48020	86776	80596	12952	28744	72080	109108	63944
Castle River Headwaters	Combined AB	35328	243	181472	35376	183508	68568	100728	71860	125472	55172	60736	110876	162040	116420	83432	64664	161476	137292	211800	65688	155392	96784	81768	57168	91640	124824	83580	69176	128260	75456	160152	110644	55364	122944	162488	102072	135736	16116	178676	60544	77512	52492	100752	15508	35312	83112	135328	99936
Waterton River Headwaters	Combined AB	44813.7	250	163164	43760	228000	115600	151820	133288	135644	74696	119196	169864	230444	132484	141896	88304	214920	195288	287788	85808	154964	114808	96532	88040	145240	140516	94268	103636	167728	86708	214080	157536	75796	154388	216512	146276	109144	24908	223836	100312	134092	119464	116884	28056	93592	144212	197996	113352
Willow Creek	Combined AB	22244	228	31996	208	42556	15844	22324	32004	14804	10348	6424	27132	32172	20228	11592	17868	25844	16108	46892	6596	19552	4300	13008	7164	22796	15620	4172	4256	12420	6308	20672	24584	124	15788	5328	10652	2544	0	24436	844	3376	7768	4216	408	680	5488	10412	3876
St Marys Tribs	Combined AB	8659.84	146	13468	212	18520	8280	9528	11892	5732	4768	5180	12132	17788	6684	7784	7356	13444	10848	30936	8132	17676	2692	8564	8116	18352	12520	2024	7216	15860	6704	23192	16068	4876	15596	18968	15124	1248	0	12664	1684	1724	2144	380	28464	236	3076	8092	1028
Oldman Headwaters	Combined AB	34514.3	305	148236	16704	140132	44288	82560	93924	104732	54964	63952	111844	150056	100300	88068	81652	82920	67600	124808	44952	106704	57748	67444	62976	86036	79684	63616	42148	80220	29852	37508	50584	10900	71928	24364	25976	94612	2264	118012	2360	60840	67648	96044	14440	37620	89156	127452	86884
				swa80_SUM	swa81_SUM	swa82_SUM	swa83_SUM	swa84_SUM	swa85_SUM	swa86_SUM	swa87_SUM	swa88_SUM	swa89_SUM	swa90_SUM	swa91_SUM	swa92_SUM	swa93_SUM	swa94_SUM	swa95_SUM	swa96_SUM	swa97_SUM	swa98_SUM	swa99_SUM	swa00_SUM	swa01_SUM	swa02_SUM	swa03_SUM	swa04_SUM	swa05_SUM	swa06_SUM	swa07_SUM	swa08_SUM	swa09_SUM	swa10_SUM	swa11_SUM	swa12_SUM	swa13_SUM	swj80_SUM	swj81_SUM	swj82_SUM	swj83_SUM	swj84_SUM	swj85_SUM	swj86_SUM	swj87_SUM	swj88_SUM	swj89_SUM	swj90_SUM	swj91_SUM
swa##_SUM is the sum of April 1 SWE of Daymet polygons in watershed
swj##_SUM is the sum of June 1 SWE of Daymet polygons in watershed
* Orig_ID for the Alberta Combined watersheds represents a single smaller watershed polygon included in the combined HUC 10 scale watershed
[truncated: 23 more columns]

## Sheet: Apr1 SWE index-PDO index
Apr1 SWE Mean
2.404
0.87
3.119
1.189
1.961	April 1 SWE 5 yr Index	PDO 5yr Index
1.541	0.2516	0.76
1.793	0.079	0.809
0.975	0.2636	0.815
1.592	-0.1652	1.078
2.204	-0.0846	1.194
2.817	-0.036	0.811
1.671	0.2912	0.568
1.403	0.1948	0.122
1.237	0.2804	-0.153
2.025	0.2904	-0.296
1.333	0.1736	0.026
4.012	-0.1232	-0.039
1.522	0.345	0.336
1.701	0.3688	0.298
1.172	0.4616	0.445
1.516	0.291	0.113
1.178	0.3276	-0.024
1.954	-0.2392	-0.113
1.713	-0.1528	-0.288
0.891	-0.1504	-0.23533
0.882	-0.2066	-0.007
1.391	-0.3334	0.332
0.936	-0.2908	0.301
2.309	-0.4944	0.432
1.488	-0.3752	-0.067
0.643	-0.2558	-0.454
1.72	-0.3036	-0.443
1.873	-0.2378	-0.598
1.305	-0.0504	-0.875
	-0.2512	-0.79

## Sheet: SWE-Latitude-Elevation
Orig ID	Latitiude	Apr SWE	Elevation (m)	Jun SWE
1	5.53331e+06	2.59	2321	1.82
2	5.50985e+06	2.06	2250	1.01
3	5.49795e+06	2	1735	0.99
4	5.47069e+06	0.74	837	0.22
5	5.22795e+06	2.15	1779	1.88
6	5.21969e+06	1.15	1588	0.55
7	5.20817e+06	1.15	1372	0.61
8	5.19063e+06	0.85	1743	0.38
9	5.24096e+06	2.33	1721	2.08
10	5.23446e+06	2.49	1955	2.38
11	5.22017e+06	1.08	1371	0.64
12	5.23097e+06	1.88	1328	1.44
13	5.21267e+06	0.82	1258	0.29
14	5.23928e+06	1.67	1452	0.94
15	5.20763e+06	0.63	1336	0.12
16	5.22583e+06	1.44	1404	0.59
17	5.20118e+06	0.79	1111	0.28
18	5.40096e+06	2.91	1296	2.62
19	5.38664e+06	2.54	1023	2.26
20	5.32642e+06	2.88	1785	2.47
21	5.33915e+06	3.03	1546	2.58
22	5.36003e+06	3.19	1276	2.85
23	5.37818e+06	2.95	1767	2.54
24	5.39559e+06	2.92	1877	2.48
25	5.3528e+06	0.64	1185	0.39
26	5.33418e+06	0.9	1052	0.59
27	5.30998e+06	0.42	1274	0.23
28	5.30121e+06	1.29	924	1.33
30	5.25186e+06	2.94	1928	2.56
31	5.27099e+06	3.17	1511	2.88
32	5.28166e+06	3.16	1920	2.93
33	5.31015e+06	2.48	1889	2.22
34	5.30778e+06	2.58	1653	2.3
35	5.32937e+06	2.41	1574	2.24
36	5.35475e+06	2.64	1195	2.4
37	5.58447e+06	2.43	2460	2.2
38	5.55885e+06	2.48	2020	2.24
39	5.53693e+06	2.2	1840	1.61
40	5.54531e+06	2.24	2154	1.54
41	5.49886e+06	2.5	1702	1.51
42	5.52023e+06	2.18	1280	1.39
43	5.48371e+06	1.87	1189	0.94
44	5.46874e+06	3.05	1725	1.85
45	5.44921e+06	3.05	1949	2.16
46	5.44632e+06	3.04	807	2.3
47	5.44225e+06	0.46	1144	0.22
48	5.39144e+06	1.14	1054	0.83
49	5.4159e+06	1.6	1099	1.54
50	5.38764e+06	1.6	1004	1.52
51	5.37169e+06	1.61	1310	1.53
52	5.35851e+06	1.53	1432	1.42
53	5.35851e+06	0.41	915	0.19
54	5.37679e+06	1.38	1281	1.29
55	5.25658e+06	2.34	1308	1.92
56	5.27526e+06	2.13	1096	2.03
57	5.29744e+06	1.74	1051	1.66
58	5.3228e+06	1.06	1414	0.89
59	5.31354e+06	0.78	1199	0.43
60	5.3002e+06	0.31	988	0.1
61	5.28384e+06	0.11	861	0.03
62	5.27493e+06	0.18	837	0.05
63	5.25041e+06	1.11	929	1.09
64	5.2679e+06	0.51	902	0.54
65	5.22943e+06	1.3	1179	1
66	5.25028e+06	0.58	1004	0.47
67	5.41715e+06	1.18	925	0.98
68	5.4342e+06	3.2	1403	2.73
69	5.41467e+06	3.12	1135	2.91
70	5.31504e+06	1.77	1918	1.44
71	5.30378e+06	0.53	1402	0.22
72	5.29666e+06	0.53	1288	0.39
74	5.32414e+06	0.53	1360	0.22
78	5.40786e+06	1.31	1508	0.47
79	5.42741e+06	0.66	1372	0.06
81	5.19777e+06	0.75	1513	0.37
82	5.21197e+06	0.31	1216	0.09
83	5.24375e+06	1.3	1904	0.91
84	5.23456e+06	0.52	1461	0.14
86	5.23795e+06	0.17	1231	0.03
90	5.29986e+06	2.29	1635	2.06
91	5.26947e+06	2.36	1974	2.28
92	5.27276e+06	0.52	1427	0.25
93	5.28302e+06	0.81	1371	0.53
94	5.26052e+06	0.65	1603	0.33
98	5.3679e+06	2.28	1553	1.69
99	5.3575e+06	1.55	1460	1.1
101	5.35814e+06	0.38	1360	0.05
102	5.34341e+06	0.67	1363	0.33
103	5.35577e+06	0.88	1248	0.62
105	5.39197e+06	1.59	1481	1.02
106	5.38499e+06	0.6	1318	0.11
111	5.42356e+06	4.44	1985	3.99
116	5.39547e+06	4.03	2400	3.69
117	5.40984e+06	3.93	1845	3.38
118	5.41802e+06	2.22	1426	1.49
119	5.42942e+06	2.27	1602	1.12
120	5.43032e+06	0.6	1317	0.05
121	5.42339e+06	4.5	2292	4.19

## Sheet: SNOTEL-Daymet pixel
		Daymet pixel	SNOTEL	Yrs of Data
Badger Pass		32.17	345.647	34
Bisson Creek		9.16	56.136	22
Copper Bottom		8.67	159.294	34
Copper Camp		32.79	262.471	34
Dupuyer Creek		8.84	156.235	30
Emery Creek		14	156.235	34
Flattop Mtn		42.94	503.647	34
Grave Cr		14.39	185.029	34
Kraft Cr		11.48	97.1765	33
Many Glacier		13.38	178.471	34
Moss Peak		36.66	175.429	28
Mt Lockhart		19.66	279.529	34
Noisy Basin		39.69	279.529	34
N Fk Jocko		41.58	281.765	24
Pike Cr		23.89	358.471	34
Stahl Peak		34.77	456.588	34
Waldron		10.51	240.824	34
Wood Cr		9.09	240.824	34
